# Supplementary material for: Clinical implication of megestrol acetate in metastatic gastric cancer: A big data analysis from Health Insurance Review and Assessment (HIRA) database
Source: Research Square preprint supplement (doi:10.21203/rs.3.rs-3241216/v1), 2023-08-14
Supplement: Supplementary file 1 [file 0c7b09e6d776eecadad6629e.docx]

**Online Resource 2** List of curative surgery by cancer type

| **Code** | **Operation** |
| --- | --- |
| Q7221 | Hepatectomy-Wedge Resection |
| Q7222 | Hepatectomy-Segmentectomy |
| Q7223 | Hepatectomy-Lobectomy |
| Q7224 | Hepatectomy-Trisegmentectomy |
| Q7225 | Hepatectomy-Bisegmentectomy |
| Q7360 | Porto-Hepaticoenterostomy |
| Q7230 | Hepatopancreaticoduodenectomy |
| Q7561 | Pancreatectomy-Total |
| Q7562 | Isolated Head Pancreatectomy |
| Q7563 | Subtotal Pancreatectomy |
| Q7564 | Pancreatectomy-Segmental Resection |
| Q7565 | Distal Pancreatectomy |
| Q7566 | Pancreatectomy-Wedge Resection |
| Q7567 | Pancreatectomy-Spleen-preserving distal pancreatectomy |
| Q7571 | Pancreaticoduodenoctomy-Whipple'S Operation |
| Q7572 | Pancreaticoduodenectomy-Pylorus-Preserving Operation |
| Q7351 | Choledochoduodenostomy |
| Q7352 | [Roux-En-Y] Choledochojejunostomy |
| Q7342 | Malignant [Radical Resection of Bile Duct] |
| Q7380 | Cholecystectomy |
| Q7410 | Radical Cholecystectomy of Gb Cancer |
| Q0292 | Rectal and Sigmoid Resection-Ultra-Low anterior resection (Intersphincteric Resection) |
| Q1261 | Colectomy-Subtotal |
| Q1262 | Colectomy-Subtotal |
| Q2671 | Right or Left Hemicolectomy |
| Q2672 | Colectomy-Total |
| Q2673 | Colectomy-Segmental Resection |
| Q2679 | Colectomy With Proximal Colostomy And Distal Stump |
| Q2890 | Resection of Rectal Tumor- Transsacral Or Parasacral |
| Q2891 | Resection of Rectal Tumor-Transanal |
| Q2892 | Resection of Rectal Tumor-Abdominal Approach |
| Q2893 | Resection of Rectal Tumor-Transanal Endoscopic Microsurgery |
| Q2921 | Rectal And Sigmoid Resection-Anterior Resection |
| Q2922 | Rectal And Sigmoid Resection-Low Anterior Resection |
| Q2923 | Rectal And Sigmoid Resection (A-P Resection (Mile'S Operation) Or A-S Resection) |
| Q2924 | Rectal and Sigmoid Resection-Abdominal Pull Through Operation |
| Q2925 | Total Coloprotectomy (With Ileostomy) |
| Q2926 | Total Coloprotectomy (With Ileal Pouch-Anal Anastomosis) |
| Q2927 | Rectal and Sigmoid Resection-Colonic J Pouch Formation |
| Q2928 | Rectal and Sigmoid Resection-Ultra-Low anterior resection |
| Q7703 | Colonoscopic Operation of Colonic Tumor-Mucosal Resection and Submucosal Resection |
| Q7752 | Sigmoidoscopic Operation of Rectosigmoidal Tumor-Mucosal Resection And Submucosal Resection |
| QA671 | Right or Left Hemicolectomy |
| QA672 | Colectomy-Total |
| QA673 | Colectomy-Segmental Resection |
| QA679 | Colectomy with Proximal Colostomy And Distal Stump |
| QA921 | Rectal and Sigmoid Resection-Anterior Resection |
| QA922 | Rectal and Sigmoid Resection-Low Anterior Resection |
| QA923 | Rectal And Sigmoid Resection (A-P Resection(Mile'S Operation) Or A-S Resection) |
| QA924 | Rectal and Sigmoid Resection-Abdominal Pull Through Operation |
| QA925 | Total Coloprotectomy (With Ileostomy) |
| QA926 | Total Coloprotectomy (With Ileal Pouch-Anal Anastomosis) |
| QA928 | Rectal and Sigmoid Resection-Ultra-Low anterior resection |
| QX706 | Colonoscopic Operation of Colonic Tumor-Submucosal Dissection |
| Q0251 | Subtotal Gastrectomy (Partial) |
| Q0252 | Subtotal Gastrectomy (Distal) |
| Q0253 | Subtotal Gastrectomy (Distal) |
| Q0254 | Subtotal Gastrectomy (Pylous Preserving) |
| Q0255 | Subtotal Gastrectomy (Pylous Preserving) |
| Q0256 | Subtotal Gastrectomy (Wedge Resection) |
| Q0257 | Subtotal Gastrectomy (Wedge Resection) |
| Q0258 | Subtotal Gastrectomy (Proximal Resection) |
| Q0259 | Subtotal Gastrectomy |
| Q2533 | Total Gastrectomy-Abdominal Approach |
| Q2534 | Total Gastrectomy-Thoracic and Abdominal Approach |
| Q2536 | Total Gastrectomy-Abdominal Approach |
| Q2537 | Total Gastrectomy-Thoracic and Abdominal Approach |
| Q2594 | Subtotal Gastrectomy (Partial) |
| Q2598 | Subtotal Gastrectomy(Proximal Resection) |
| Q7651 | Endoscopic Operation Of Upper Gastrointestinal Tumor-Removal Or Ablation |
| Q7652 | Endoscopic Operation Of Upper Gastrointestinal Tumor-Mucosal Resection And Submucosal Resection |
| Q7653 | Endoscopic Submucosal Dissection |
| QA536 | Total Gastrectomy |
| QZ933 | Endoscopic Submucosal Dissection |
