# Supplementary material for: Clinical implication of megestrol acetate in metastatic gastric cancer: A big data analysis from Health Insurance Review and Assessment (HIRA) database
Source: Research Square preprint supplement (doi:10.21203/rs.3.rs-3241216/v1), 2023-08-14
Supplement: Supplementary file 2 [file 22ec13a72a6fc935066108a2.docx]

**Online Resource 3** Multivariate logistic regression for prescription of megestrol acetate

|  | **Odds ratio** | **95% confidence interval** | ***P*** |
| --- | --- | --- | --- |
| **Age** (per 10 years) | 1.138 | (1.049-1.234) | .002 |
| **Sex** |  |  |  |
| Male (ref) | 1.000 |  |  |
| Female | 0.895 | (0.724-1.106) | .30 |
| **Insurance type** |  |  |  |
| Medical aid (ref) | 1.000 |  |  |
| Health insurance | 1.214 | (0.777-1.896) | .39 |
| **mCCI** |  |  |  |
| 0-1 (ref) | 1.000 |  |  |
| 2+ | 0.828 | (0.650-1.054) | .13 |
| **Hospital type** |  |  |  |
| Other (ref) | 1.000 |  |  |
| Tertiary hospital | 1.000 | (0.799-1.252) | >.99 |
| **Treatment status** |  |  |  |
| BSC alone (ref) | 1.000 |  |  |
| Palliative chemotherapy | 5.612 | (4.413-7.137) | <.001 |

*mCCI,* modified Charlson Comorbidity Index; *BSC,* best supportive care
