# Supplementary material for: Clinical implication of megestrol acetate in metastatic gastric cancer: A big data analysis from Health Insurance Review and Assessment (HIRA) database
Source: Research Square preprint supplement (doi:10.21203/rs.3.rs-3241216/v1), 2023-08-14
Supplement: Supplementary file 3 [file 47414637754a65a8f781a21f.docx]

**Online Resource 7** Multivariate logistic regression for occurrence of venous thromboembolism considering prescription pattern of MA

| **Variables** | **OR** | **95% CI** | ***P*** | **Variables** | **OR** | **95% CI** | ***P*** |
| --- | --- | --- | --- | --- | --- | --- | --- |
| **Age** (per 10 years) | 1.098 | (0.889-1.356) | 0.3864 | **Age** (per 10 years) | 1.085 | (0.881-1.336) | 0.4419 |
| **Sex** |  |  |  | **Sex** |  |  |  |
| Male (ref) | 1.000 |  |  | Male (ref) | 1.000 |  |  |
| Female | 1.363 | (0.787-2.363) | 0.2692 | Female | 1.308 | (0.756-2.262) | 0.3375 |
| **Insurance type** |  |  |  | **Insurance type** |  |  |  |
| Medical aid (ref) | 1.000 |  |  | Medical aid (ref) | 1.000 |  |  |
| Health insurance | 0.517 | (0.182-1.470) | 0.2158 | Health insurance | 0.500 | (0.176-1.423) | 0.1941 |
| **mCCI Group** |  |  |  | **mCCI Group** |  |  |  |
| 0-1 (ref) | 1.000 |  |  | 0-1 (ref) | 1.000 |  |  |
| 2+ | 0.757 | (0.339-1.692) | 0.4980 | 2+ | 0.774 | (0.347-1.727) | 0.5310 |
| **Hospital type** |  |  |  | **Hospital type** |  |  |  |
| Other (ref) | 1.000 |  |  | Other (ref) | 1.000 |  |  |
| Tertiary hospital | 1.341 | (0.707-2.545) | 0.3695 | Tertiary hospital | 1.412 | (0.743-2.685) | 0.2922 |
| **Prescription pattern of MA** |  |  |  | **Average daily dose of MA** |  |  |  |
| No (ref) | 1.000 |  |  | No (ref) | 1.000 |  |  |
| Intermittent | 1.244 | (0.652-2.374) | 0.5086 | < 650 mg | 1.662 | (0.824-3.353) | 0.1563 |
| Continuous | 1.504 | (0.736-3.073) | 0.2631 | ≥ 650 mg | 1.060 | (0.517-2.175) | 0.8729 |
| **Treatment status** |  |  |  | **Treatment status** |  |  |  |
| BSC alone (ref) | 1.000 |  |  | BSC alone (ref) | 1.000 |  |  |
| Palliative chemotherapy | 1.883 | (0.860-4.122) | 0.1136 | Palliative chemotherapy | 1.571 | (0.763-3.237) | 0.2205 |

*OR,* odds ratio; *CI,* confidence interval; *mCCI,* modified Charlson Comorbidity Index; *MA,* megestrol acetate; *BSC,* best supportive care
