# Supplementary material for: Clinical implication of megestrol acetate in metastatic gastric cancer: A big data analysis from Health Insurance Review and Assessment (HIRA) database
Source: Research Square preprint supplement (doi:10.21203/rs.3.rs-3241216/v1), 2023-08-14
Supplement: Supplementary file 4 [file 63912a7c25e70e8064aa8717.docx]

**Online Resource 6** Multivariate logistic regression for occurrence of venous thromboembolism with stratification by treatment status

|  | **Palliative chemotherapy** | | | **BSC alone** | | |
| --- | --- | --- | --- | --- | --- | --- |
| **OR** | **95% CI** | ***P*** | **OR** | **95% CI** | ***P*** |
| **Age** (per 10 years) | 1.041 | (0.820-1.323) | .74 | 1.273 | (0.787-2.058) | .33 |
| **Sex** |  |  |  |  |  |  |
| Male (ref) | 1.000 |  |  | 1.000 |  |  |
| Female | 1.272 | (0.668-2.422) | .46 | 1.376 | (0.453-4.176) | .57 |
| **Insurance type** |  |  |  |  |  |  |
| Medical aid (ref) | 1.000 |  |  | 1.000 |  |  |
| Health insurance | 0.470 | (0.141-1.566) | .22 | 0.477 | (0.059-3.839) | .49 |
| **mCCI Group** |  |  |  |  |  |  |
| 0-1 (ref) | 1.000 |  |  | 1.000 |  |  |
| 2+ | 0.495 | (0.152-1.612) | .24 | 1.465 | (0.444-4.836) | .53 |
| **Hospital type** |  |  |  |  |  |  |
| Other (ref) | 1.000 |  |  | 1.000 |  |  |
| Tertiary hospital | 0.879 | (0.440-1.754) | .71 | 5.961 | (1.256-28.303) | .02 |
| **MA prescription** |  |  |  |  |  |  |
| non-MA prescription (ref) | 1.000 |  |  | 1.000 |  |  |
| MA prescription | 1.097 | (0.520-2.312) | .81 | 1.926 | (0.628-5.913) | .25 |

*BSC,* best supportive care; *OR,* odds ratio; *CI,* confidence interval; *mCCI,* modified Charlson Comorbidity Index; *MA,* megestrol acetate
