# Supplementary material for: Clinical implication of megestrol acetate in metastatic gastric cancer: A big data analysis from Health Insurance Review and Assessment (HIRA) database
Source: Research Square preprint supplement (doi:10.21203/rs.3.rs-3241216/v1), 2023-08-14
Supplement: Supplementary file 5 [file 9afb80b7da99d0d97726d09f.docx]

**Online Resource 4** Baseline characteristics by prescription pattern of megestrol acetate

|  | **Continuous** | | **Intermittent** | | ***P*** |
| --- | --- | --- | --- | --- | --- |
| **(*N*=343)** | | **(*N*=583)** | |
| **No.** | **%** | **No.** | **%** |
| **Age, years** |  |  |  |  | <.001 |
| Median | 68.0 | | 62.0 | |  |
| 25 percentile | 58.0 | | 54.0 | |  |
| 75 percentile | 77.0 | | 72.0 | |  |
| **Sex** |  |  |  |  | .55 |
| Male | 247 | 72.0 | 409 | 70.2 |  |
| Female | 96 | 28.0 | 174 | 29.9 |  |
| **Insurance type** |  |  |  |  | .08 |
| Health insurance | 323 | 94.2 | 563 | 96.6 |  |
| Medical aid | 20 | 5.8 | 20 | 3.4 |  |
| **mCCI Group** |  |  |  |  | .10 |
| 0 | 221 | 64.4 | 422 | 72.4 |  |
| 1 | 48 | 14.0 | 59 | 10.1 |  |
| 2 | 49 | 14.3 | 61 | 10.5 |  |
| 3 | 18 | 5.3 | 27 | 4.6 |  |
| 4+ | 7 | 2.0 | 14 | 2.4 |  |
| **Hospital type** |  |  |  |  | .43 |
| Tertiary hospital | 240 | 70.0 | 422 | 72.4 |  |
| Other | 103 | 30.0 | 161 | 27.6 |  |
| **Treatment status** |  |  |  |  | <.001 |
| BSC alone | 81 | 23.6 | 64 | 11.0 |  |
| Palliative chemotherapy | 262 | 76.4 | 519 | 89.0 |  |

*mCCI,* modified Charlson Comorbidity Index; *BSC,* best supportive care
