# Supplementary material for: Clinical implication of megestrol acetate in metastatic gastric cancer: A big data analysis from Health Insurance Review and Assessment (HIRA) database
Source: Research Square preprint supplement (doi:10.21203/rs.3.rs-3241216/v1), 2023-08-14
Supplement: Supplementary file 7 [file fe120e7decfcaec6a56ee9f3.docx]

**Online Resource 5** Multivariate time-dependent Cox regression for survival

|  | **Palliative chemotherapy** | | | **BSC alone** | | |
| --- | --- | --- | --- | --- | --- | --- |
| **HR** | **95% CI** | ***P*** | **HR** | **95% CI** | ***P*** |
| **Age** (per 10 years) | 1.019 | (0.968-1.074) | .47 | 1.056 | (0.987-1.129) | .11 |
| **Sex** |  |  |  |  |  |  |
| Male (ref) | 1.000 |  |  | 1.000 |  |  |
| Female | 1.064 | (0.922-1.227) | .40 | 0.904 | (0.772-1.057) | .21 |
| **Insurance type** |  |  |  |  |  |  |
| Medical aid (ref) | 1.000 |  |  | 1.000 |  |  |
| Health insurance | 0.917 | (0.660-1.274) | .61 | 1.101 | (0.814-1.488) | .53 |
| **mCCI Group** |  |  |  |  |  |  |
| 0-1 (ref) | 1.000 |  |  | 1.000 |  |  |
| 2+ | 1.009 | (0.852-1.196) | .91 | 0.953 | (0.808-1.124) | .57 |
| **Hospital type** |  |  |  |  |  |  |
| Other (ref) | 1.000 |  |  | 1.000 |  |  |
| Tertiary hospital | 0.920 | (0.790-1.071) | .28 | 0.693 | (0.591-0.813) | <.001 |
| **MA prescription** |  |  |  |  |  |  |
| non-MA prescription (ref) | 1.000 |  |  | 1.000 |  |  |
| MA prescription | 1.001 | (1.000-1.001) | <.001 | 1.000 | (0.999-1.001) | .52 |

*BSC,* best supportive care; *HR,* hazard ratio; *CI,* confidence interval; *MA,* megestrol acetate; *mCCI,* modified Charlson Comorbidity Index
